# Supplementary material for: High-Temperature Spin Crossover in Iron(II) Complexes with 2,6-Bis(1H-imidazol-2-yl)pyridine
Source: MDPI journal article supplement (doi:10.3390/molecules27165093), 2022-08-10
Supplement: s1 [file s1]

# Supplementary Materials

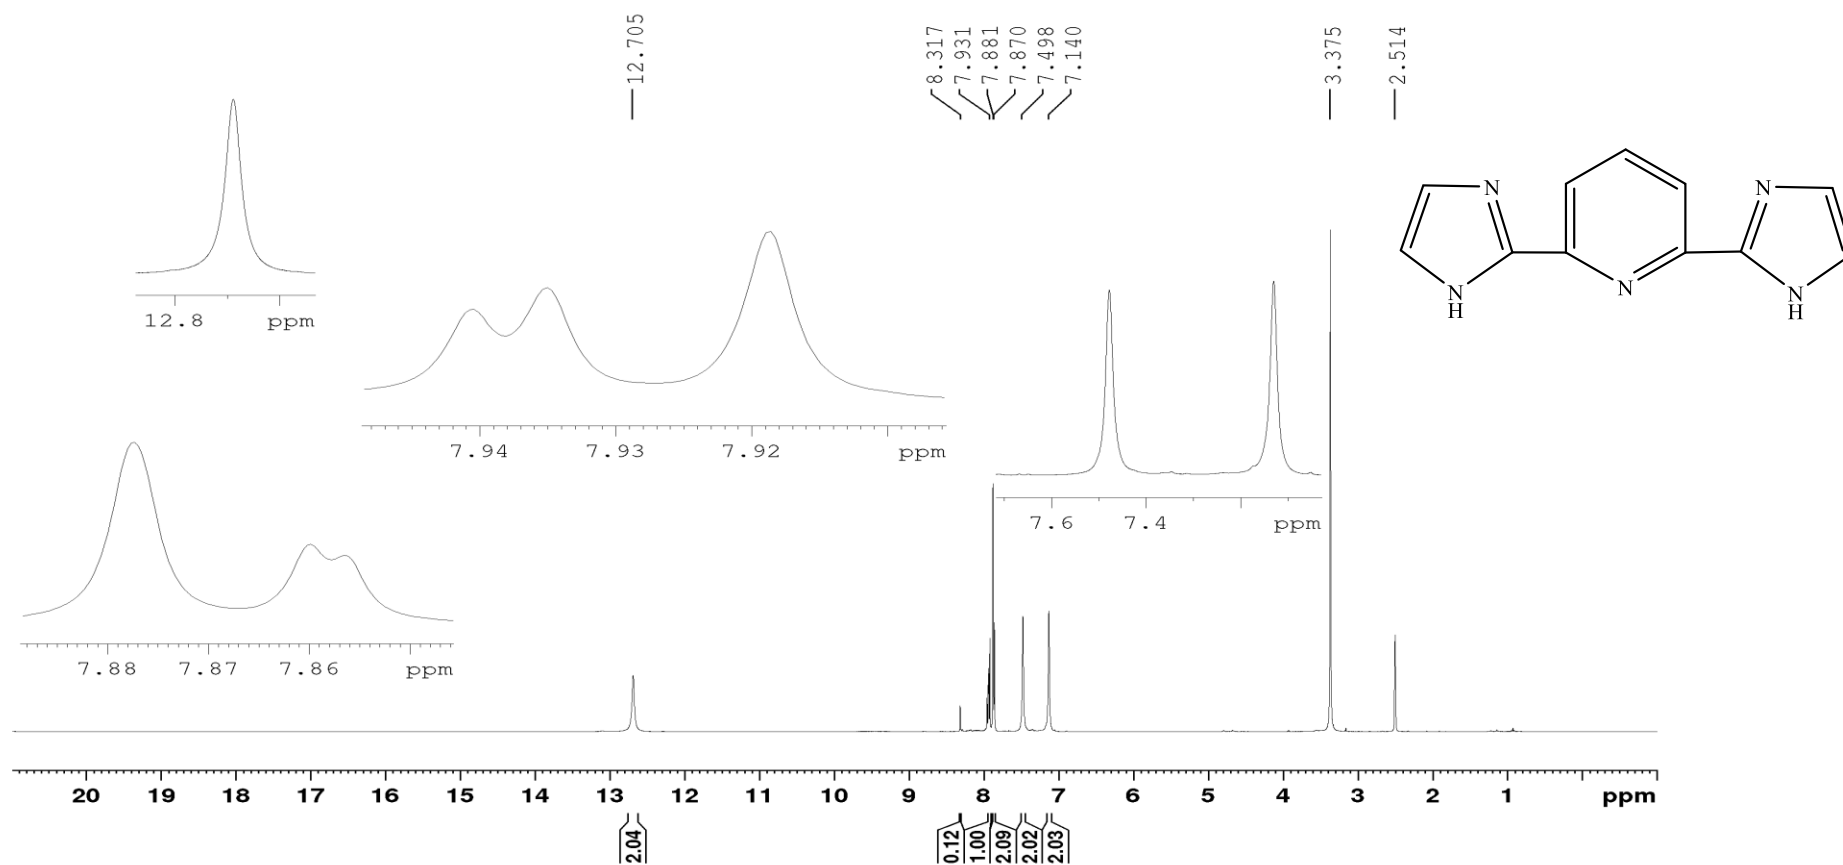

**Figure S1.** NMR <sup>1</sup>H of 2,6-di(1H-imidazol-2-yl)pyridine, 100 MHz, NS 24.

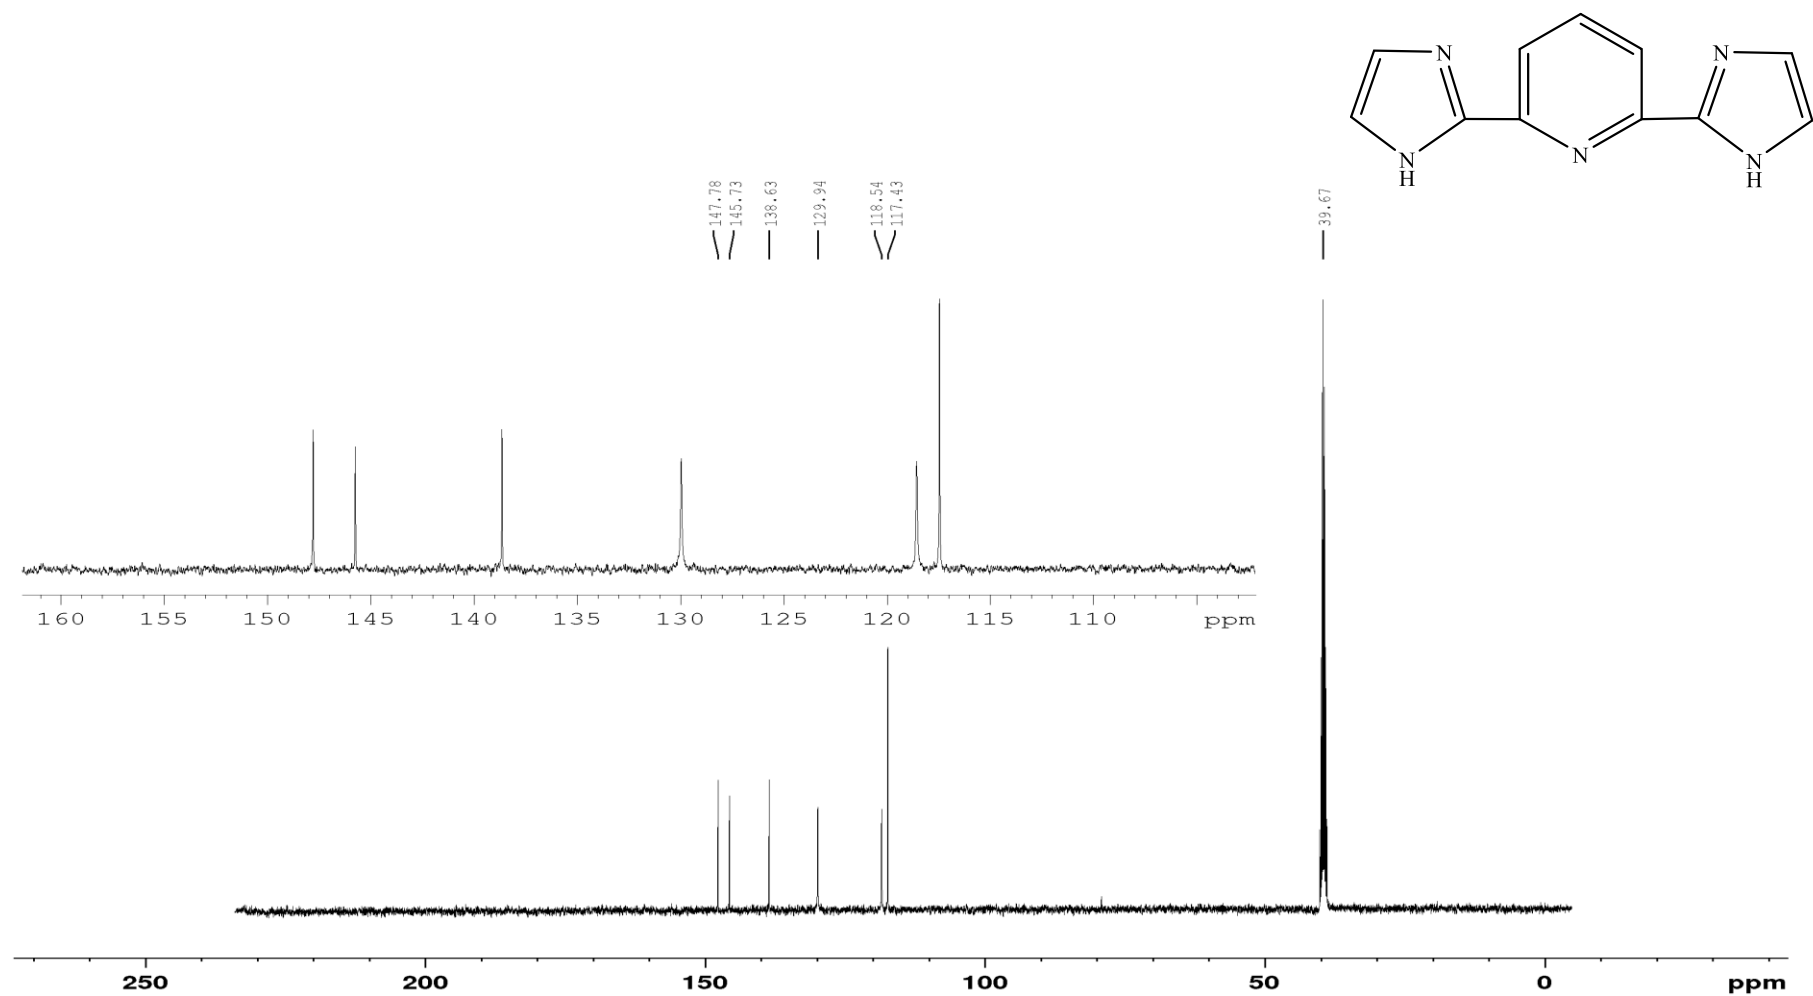

**Figure S2.** NMR  $^{13}\text{C}$  of 2,6-di(1H-imidazol-2-yl)pyridine, 100 MHz, NS 96.

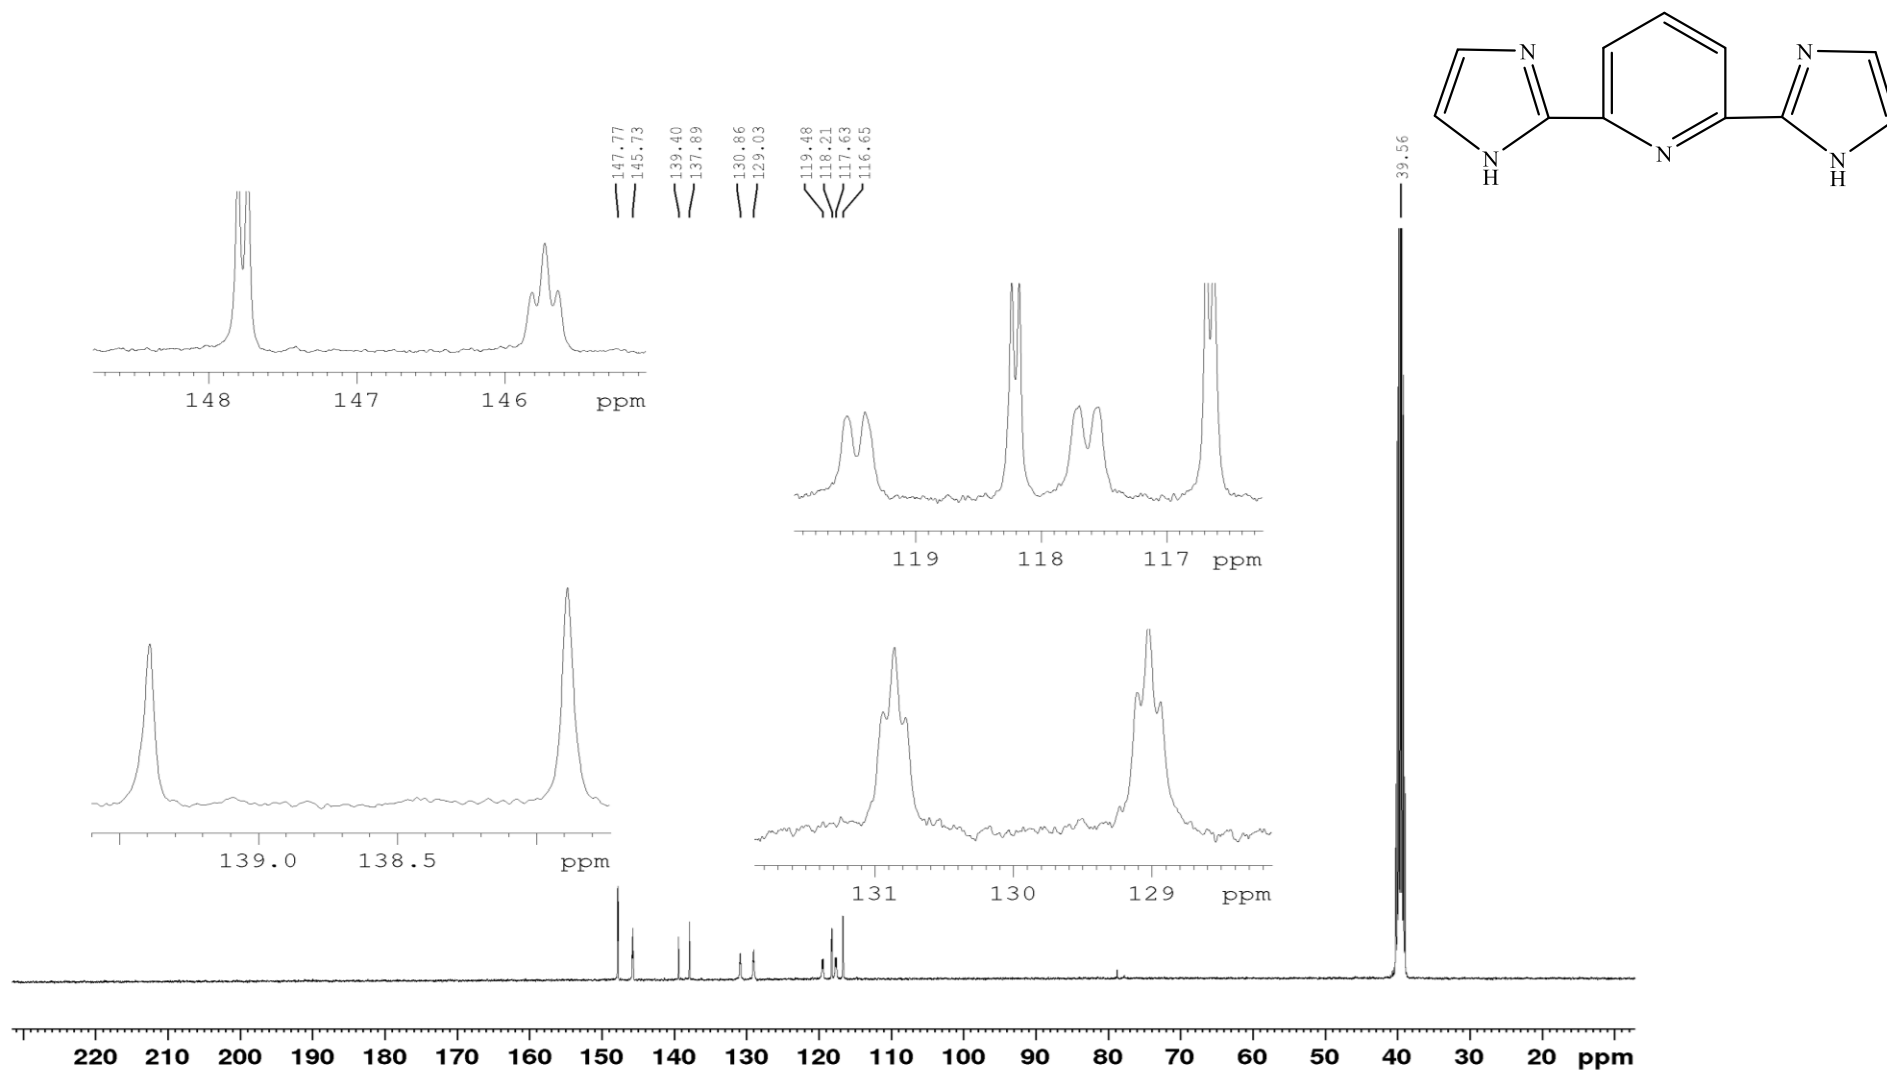

**Figure S3.** NMR <sup>13</sup>C of 2,6-di(1H-imidazol-2-yl)pyridine, 100 MHz, NS 7376.

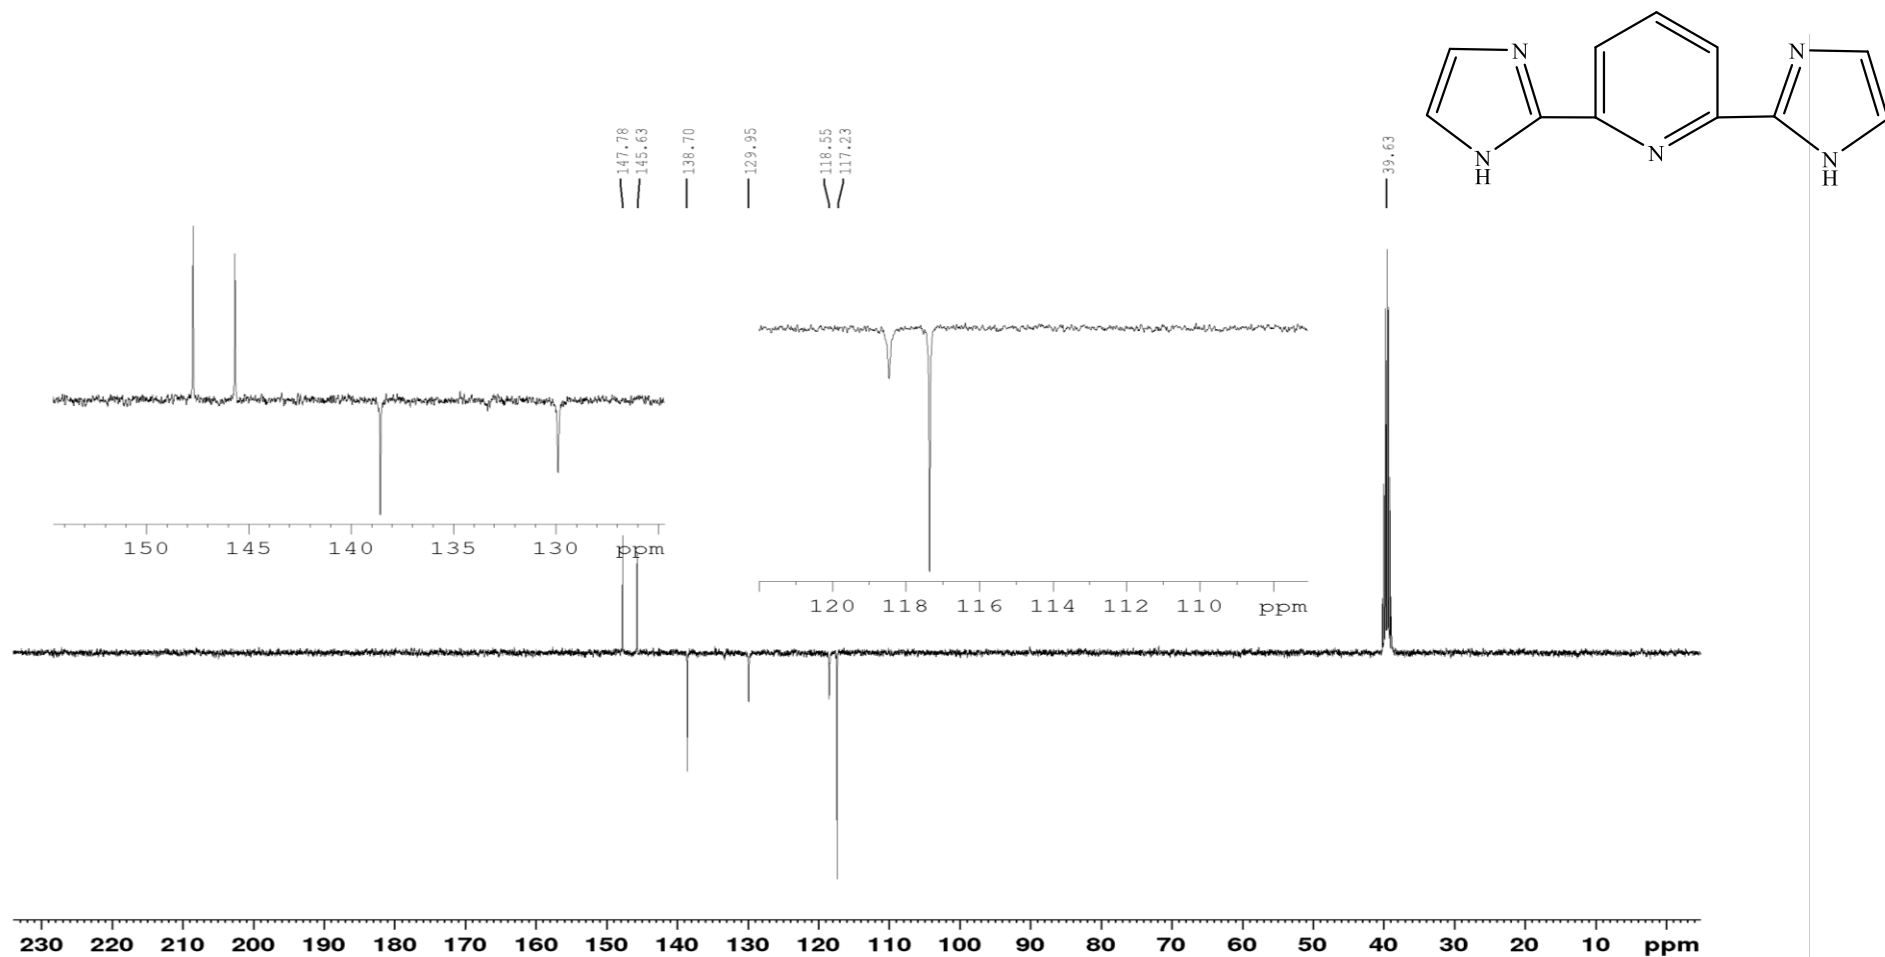

**Figure S4.** NMR  $^{13}\text{C}$  of 2,6-di(1H-imidazol-2-yl)pyridine, 100 MHz, NS 176.

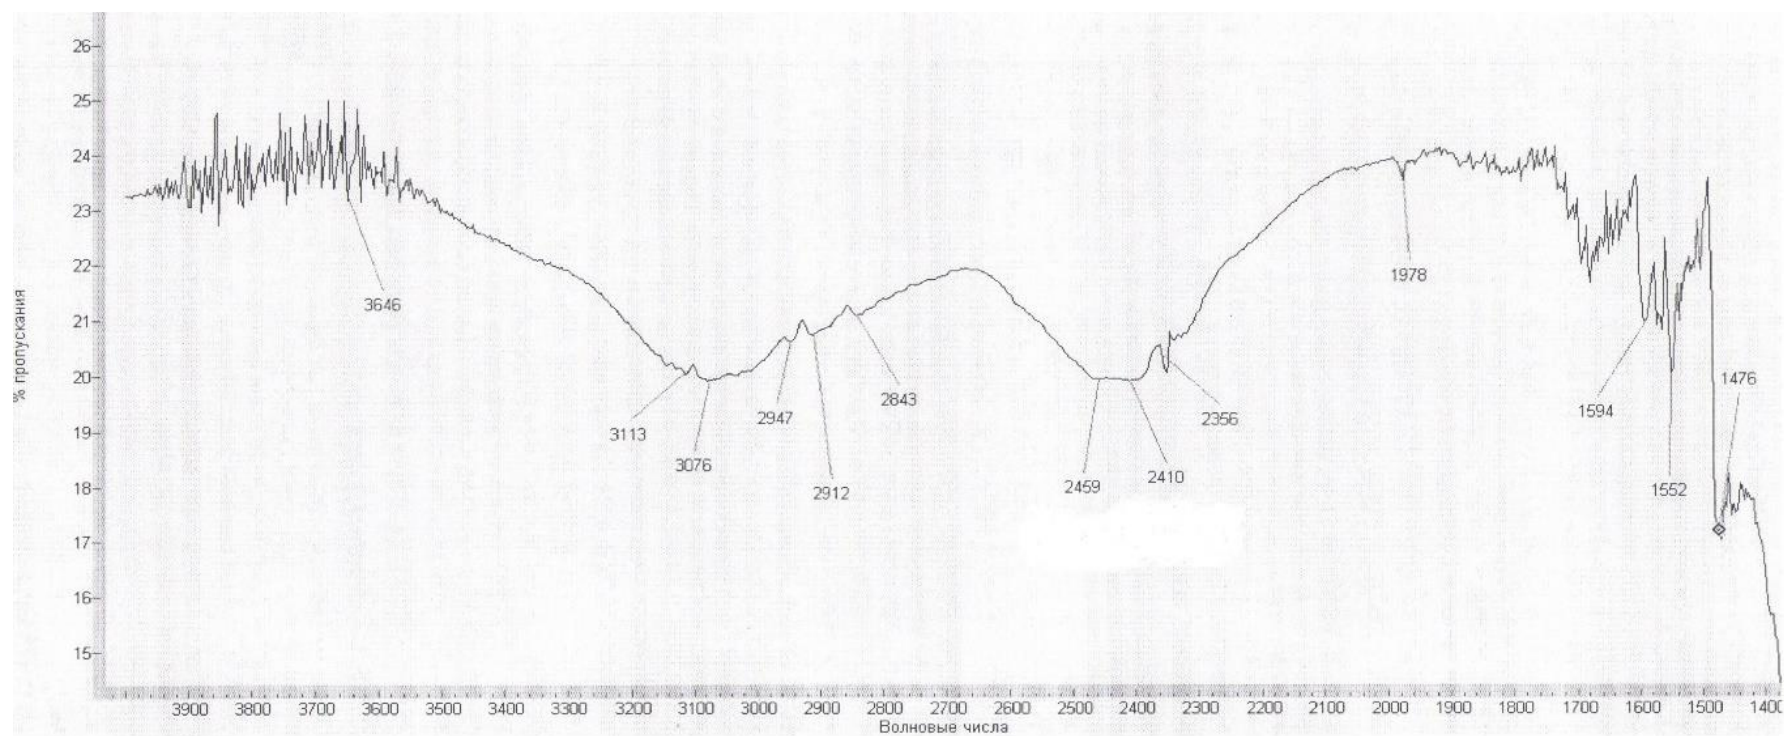

**Figure S5.** IR spectrum of 2,6-bis(1H-imidazol-2-yl)pyridine (L).

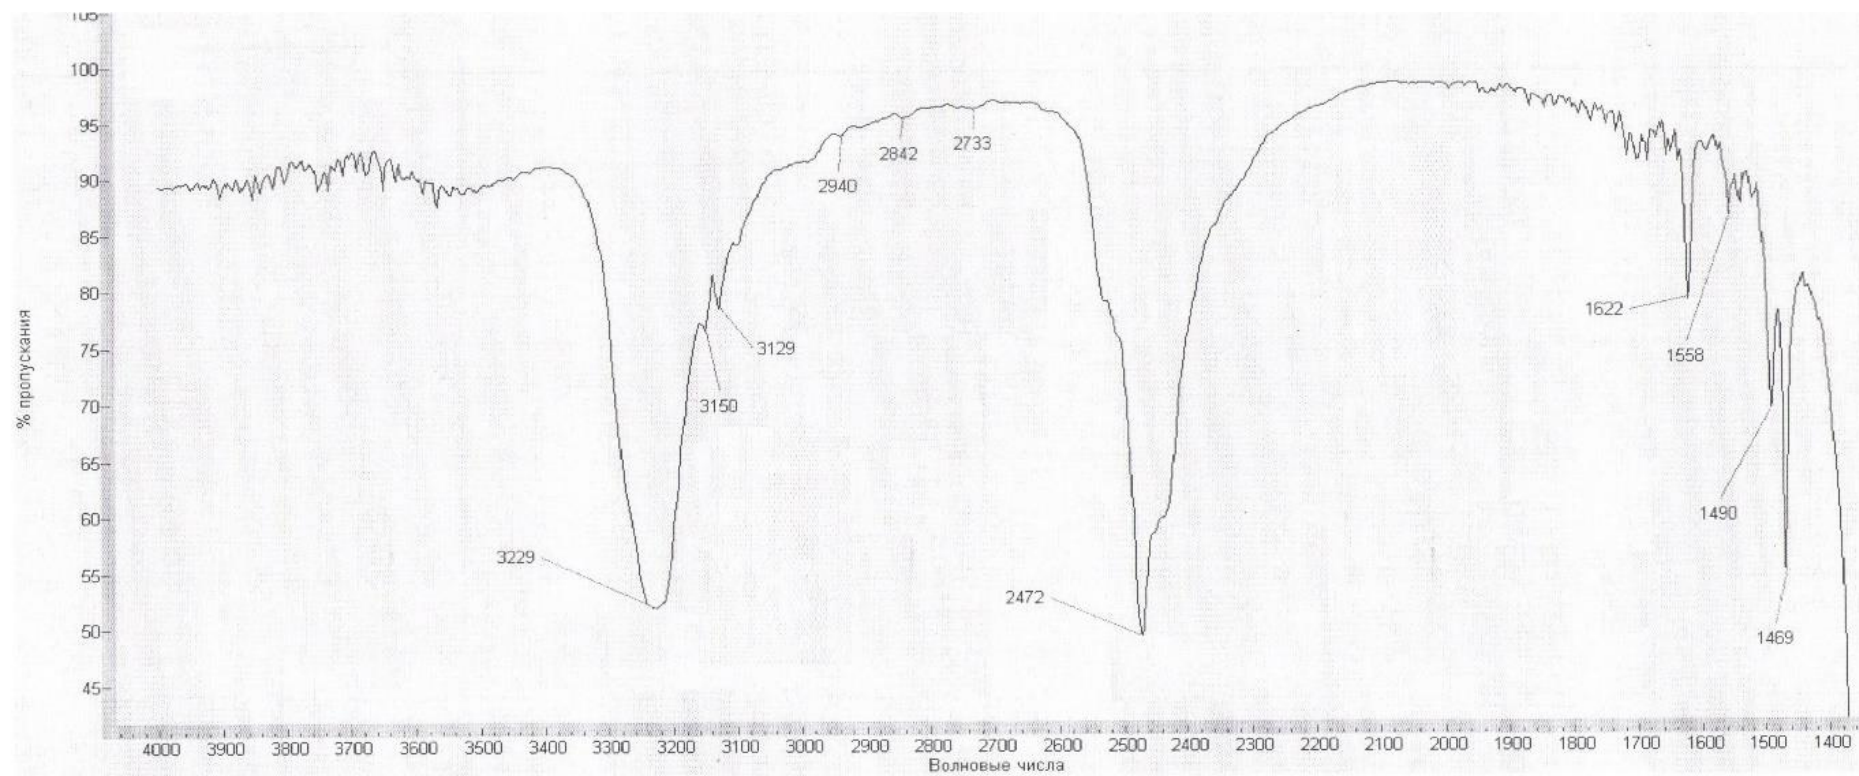

**Figure S6.** IR spectrum of  $[\text{FeL}_2]\text{B}_{10}\text{H}_{10} \cdot \text{H}_2\text{O} (4 \cdot \text{H}_2\text{O})$ .

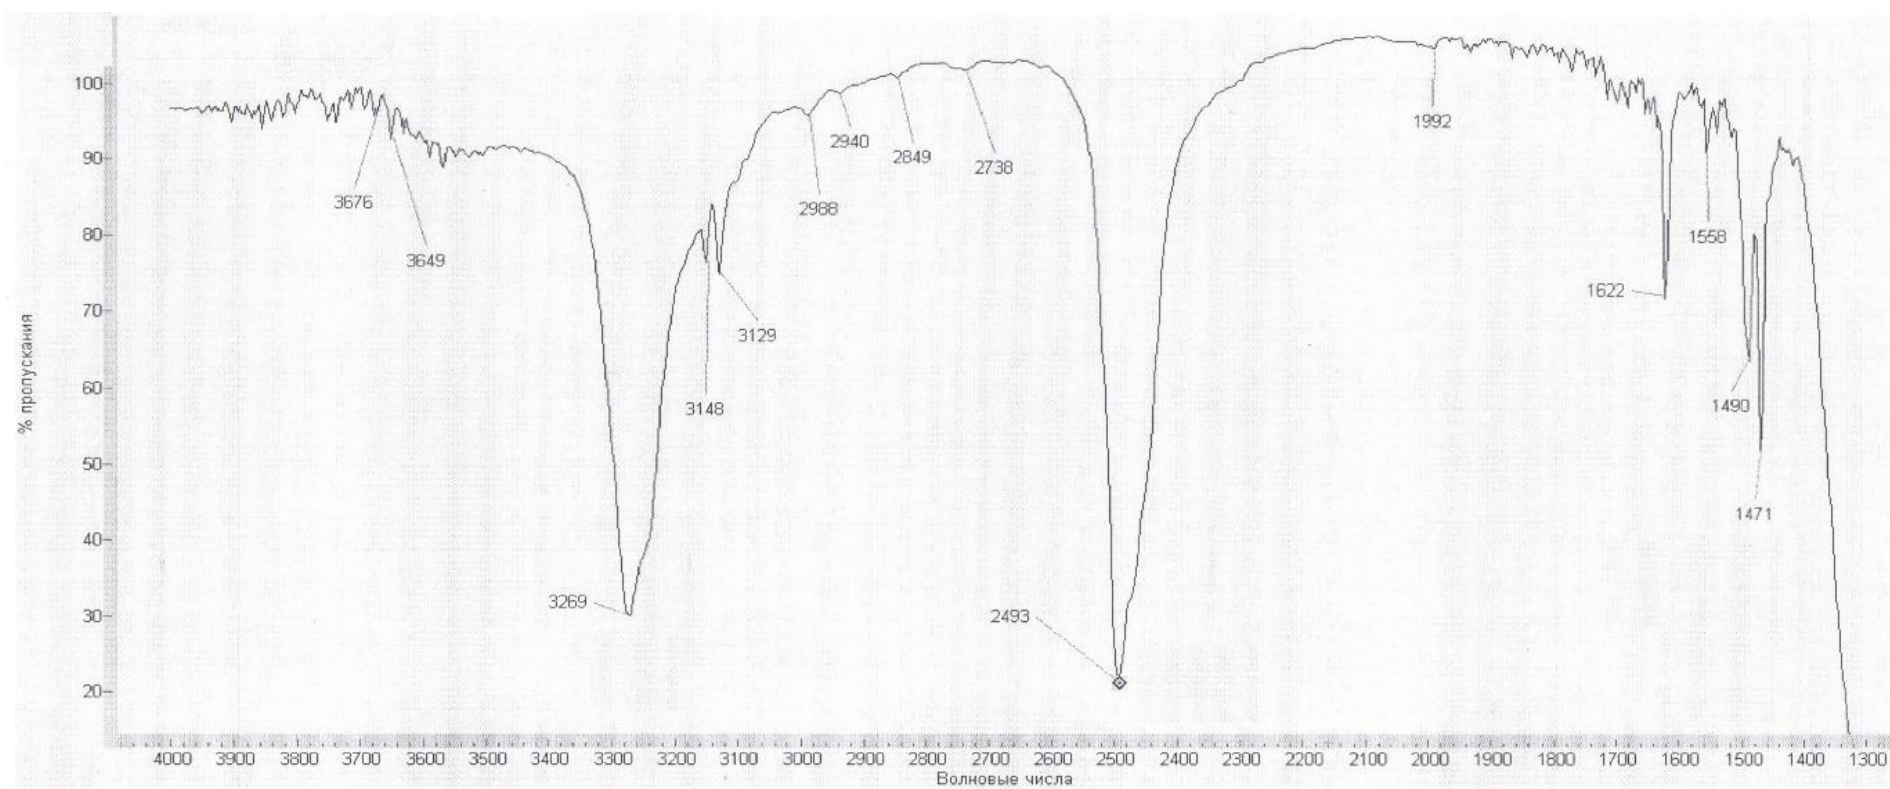

**Figure S7.** IR spectrum of  $[\text{FeL}_2]\text{B}_{12}\text{H}_{12} \cdot 1.5\text{H}_2\text{O}$  (5·1.5H<sub>2</sub>O).

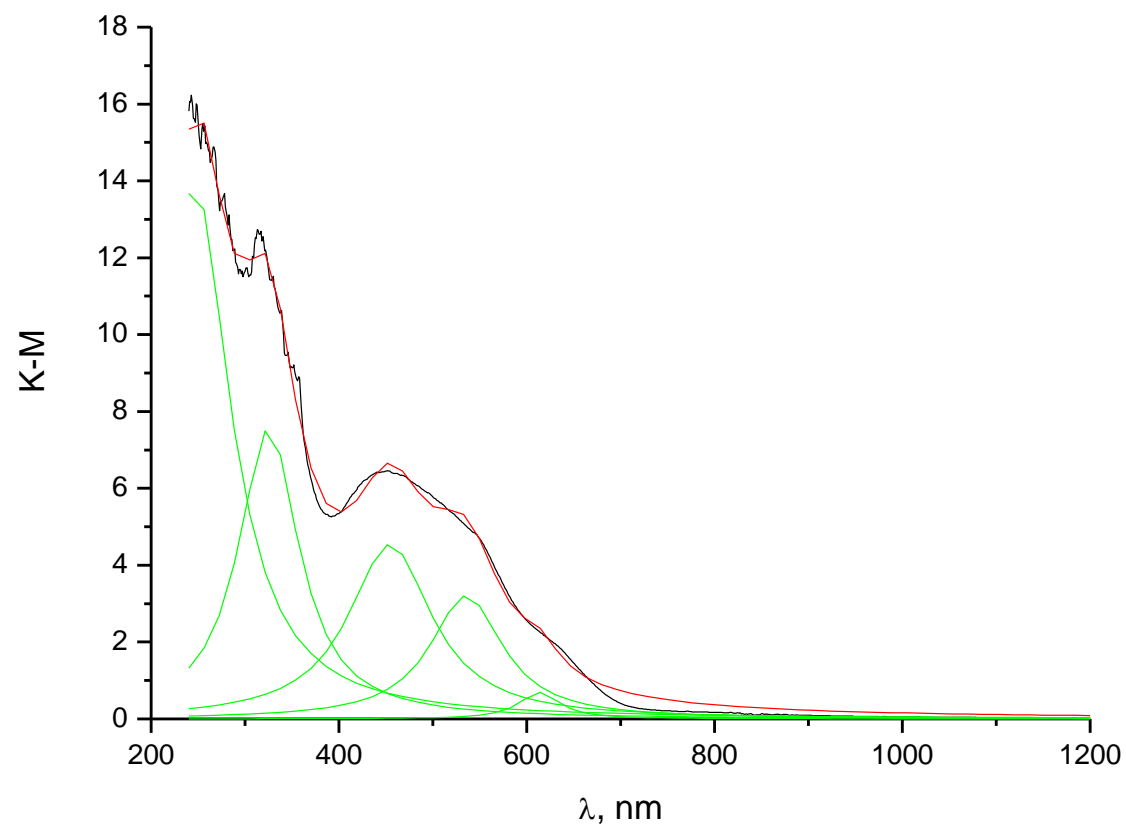

**Figure S8.** Comparison of the experimental DRS and model for complex  $[\text{FeL}_2]\text{SO}_4 \cdot 0.5\text{H}_2\text{O}$ .



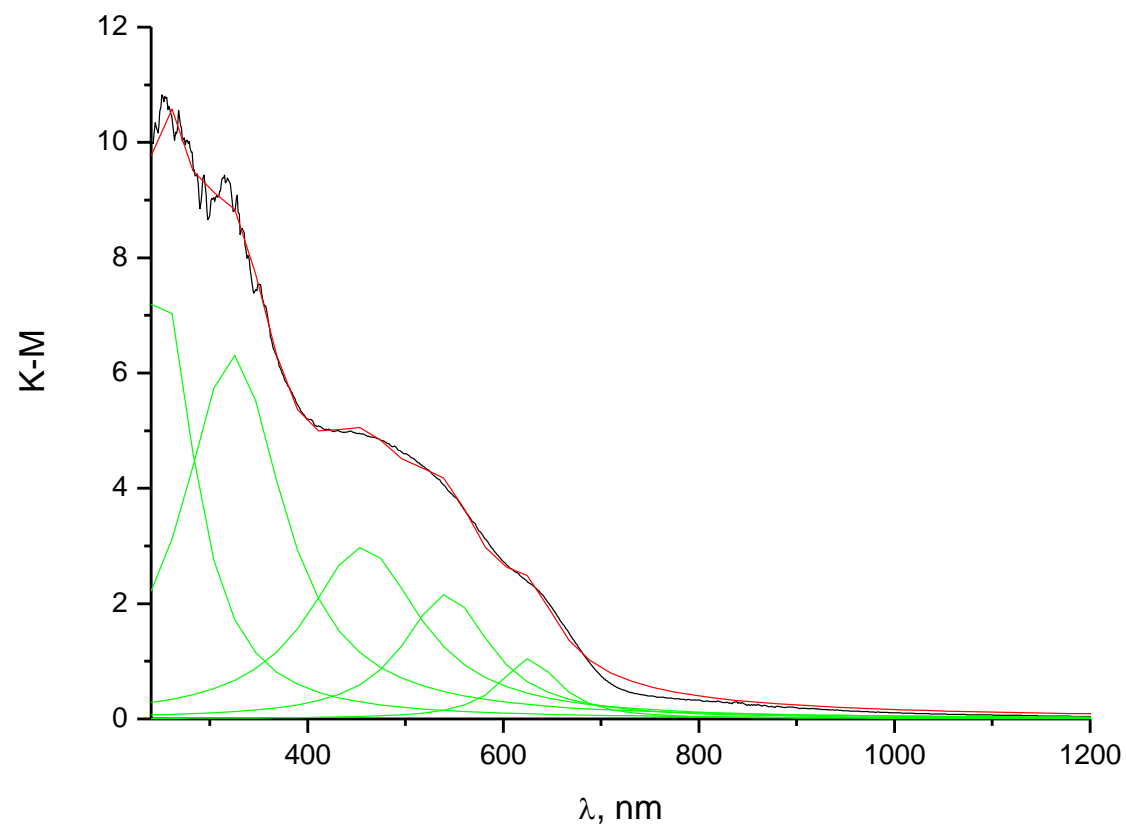

**Figure S9.** Comparison of the experimental DRS and model for complex  $[\text{FeL}_2]\text{Br}_2 \cdot \text{H}_2\text{O}$ .

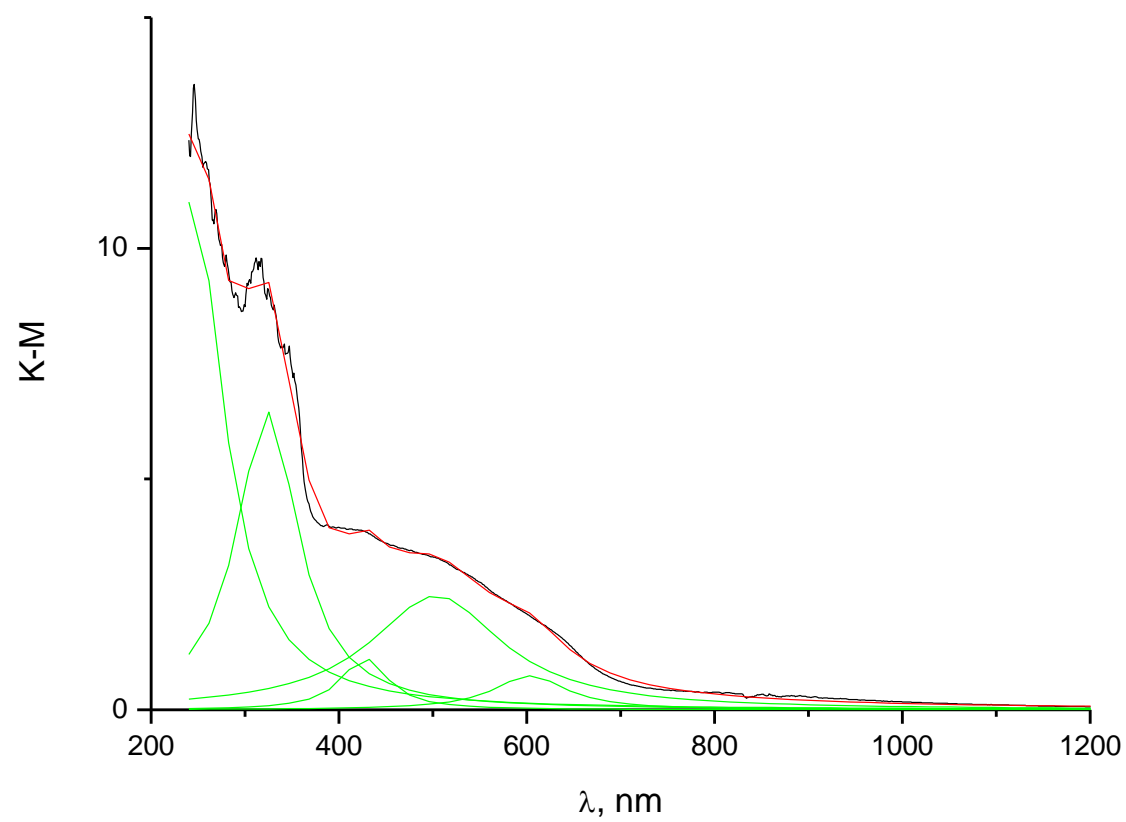

**Figure S10.** Comparison of the experimental DRS and model for complex  $[\text{FeL}_2](\text{ReO}_4)_2$ .

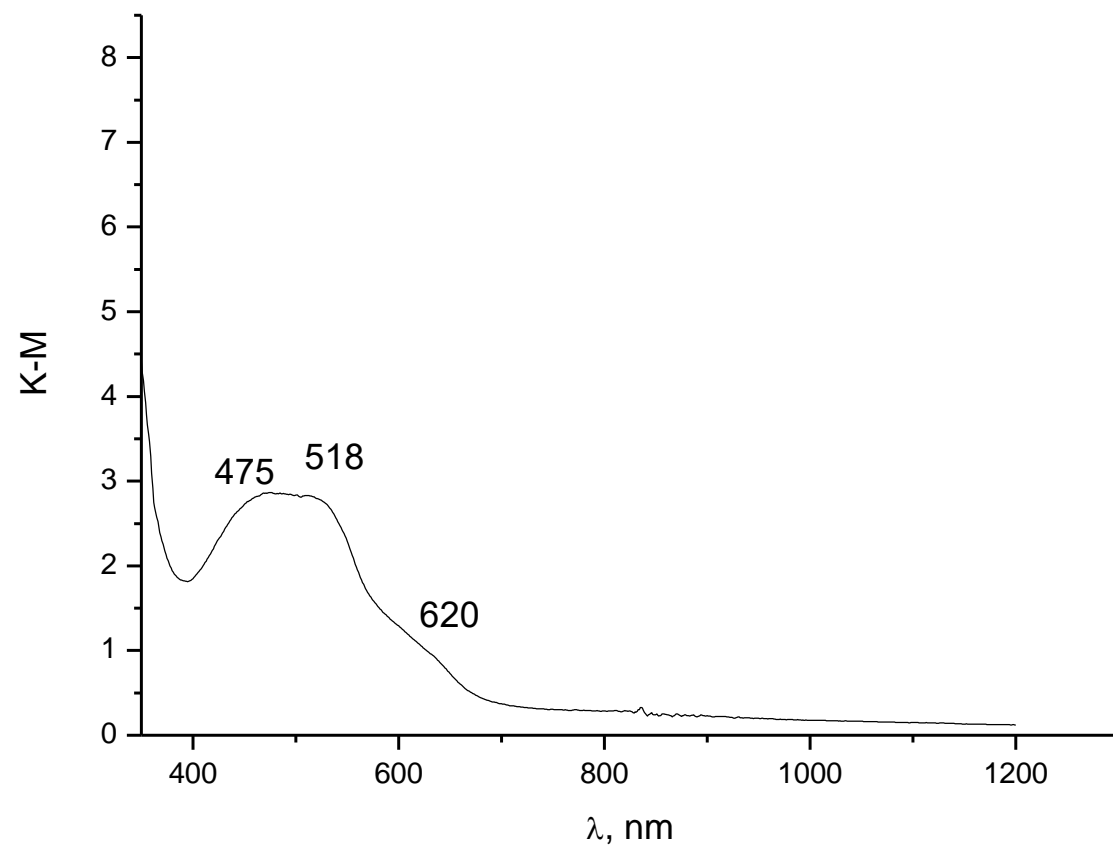

**Figure S11.** DRS for complex  $[\text{FeL}_2]\text{B}_{10}\text{H}_{10}\cdot\text{H}_2\text{O}$ .

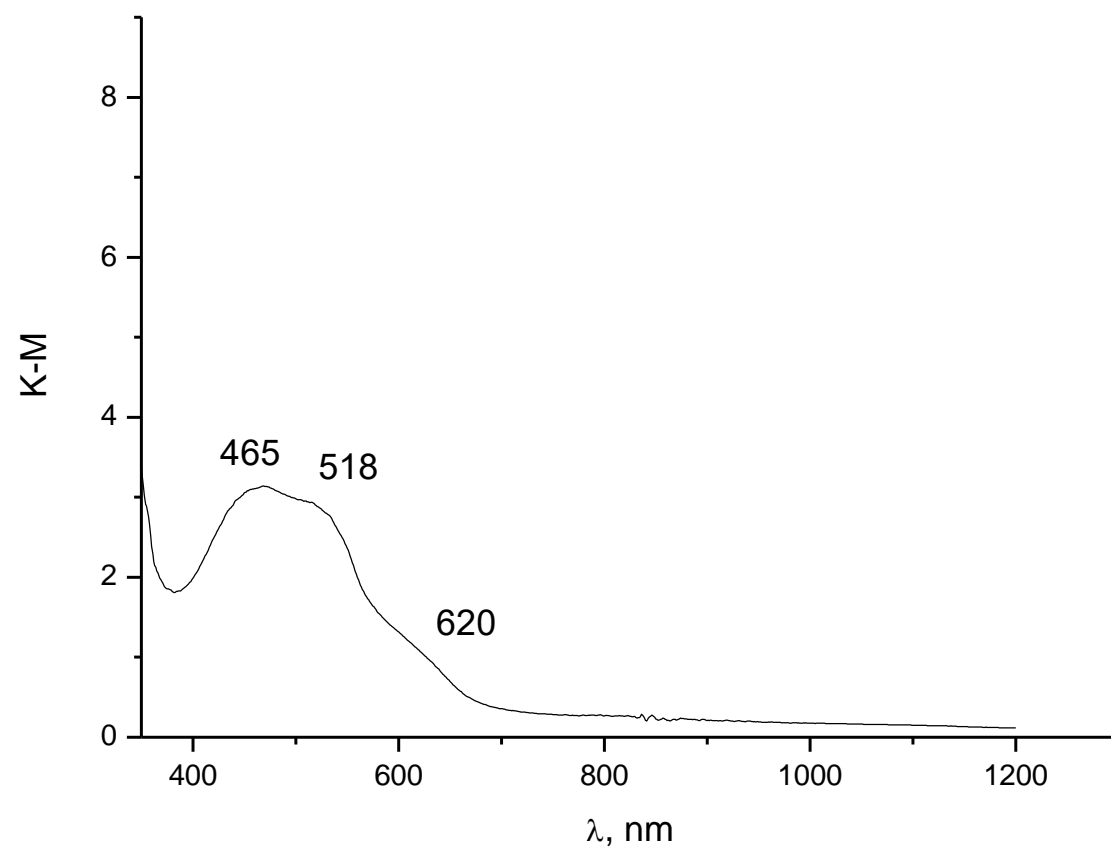

**Figure S12.** DRS for complex  $[\text{FeL}_2]\text{B}_{12}\text{H}_{12} \cdot 1.5\text{H}_2\text{O}$ .
